# Supplementary material
Source: PubMed Central journal article supplement (PMC3167554)
Supplement: 1109503108_pnas.201109503SI.pdf [file 1109503108_pnas.201109503SI.pdf]

# Supporting Information

Whitney et al. 10.1073/pnas.1109503108

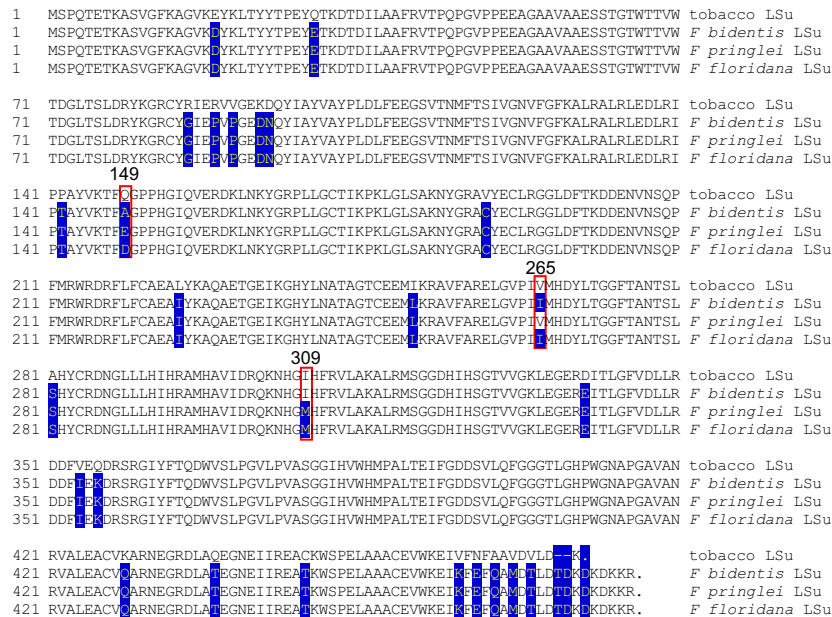

**Fig. S1.** Sequence comparison of tobacco and *Flaveria* ribulose-1,5-bisphosphate carboxylase/oxygenase (rubisco) large subunits (L-subunits). Sequences were aligned using ClustalW (1). Amino acid residues differing from the tobacco L-subunit (GenBank accession number Z00444) are shaded blue. The positions of the divergent residues in the *Flaveria* L-subunits (at residues 149, 265, and 309) are boxed in red.

1. Thompson JD, Higgins DG, Gibson TJ (1994) CLUSTAL W: Improving the sensitivity of progressive multiple sequence alignment through sequence weighting, position-specific gap penalties and weight matrix choice. *Nucleic Acids Res* 22:4673–4680.

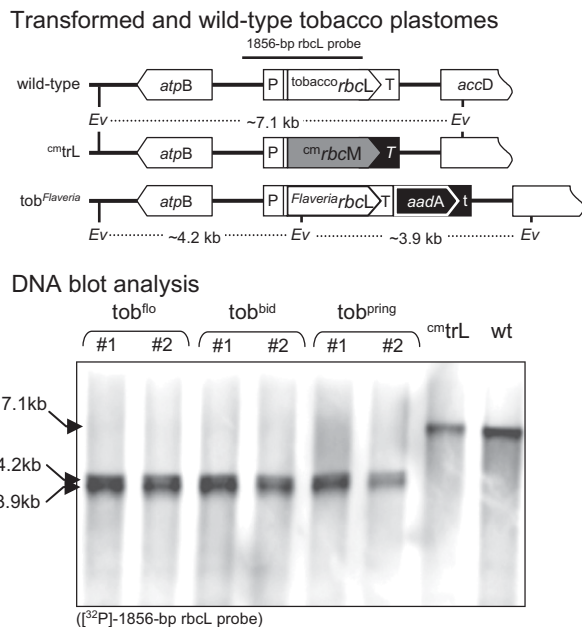

**Fig. S2.** DNA blot analysis of homoplasmy. Unlike the *rbcl* in wild-type tobacco and the tobacco master line *cmtrL* (1), the *Flaveria rbcl* genes introduced into the tobacco plastome contain an *EcoRV* site (Ev, Lower). Total genomic DNA from mature leaves of transformed T<sub>1</sub> progeny (germinated on Murashige and Skoog medium containing spectinomycin before transfer to growth in soil) and control plants (wild-type and *cmtrL*) was isolated using the DNeasy Plant Mini Kit (Qiagen), digested with *EcoRV*, and examined by Southern (DNA) blot analysis as described (2) using a <sup>32</sup>P-labeled 1,856-bp *rbcl* probe as shown (Upper). In wild-type and *cmtrL* plants the *rbcl* probe recognizes a single fragment of ~7.1 kb. Correct insertion of a *Flaveria rbcl* and *aadA* gene is indicated by hybridization to two fragments of 3.9 and 4.2 kb, respectively. No 7.1-kb band was present in the transformed lines, indicating they were homoplasmic.

- Whitney SM, Sharwood RE (2008) Construction of a tobacco master line to improve Rubisco engineering in chloroplasts. *J Exp Bot* 59:1909–1921.
- Whitney SM, Andrews TJ (2001) Plastome-encoded bacterial ribulose-1,5-bisphosphate carboxylase/oxygenase (RubisCO) supports photosynthesis and growth in tobacco. *Proc Natl Acad Sci USA* 98:14738–14743.

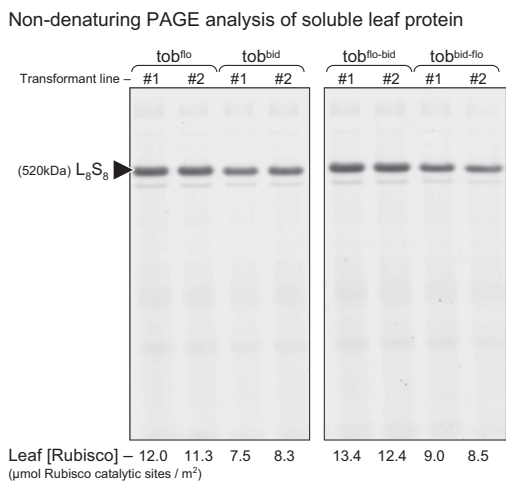

**Fig. S3.** Nondenaturing PAGE analysis of soluble protein from 2 mm<sup>2</sup> of leaf. Soluble protein from 2 mm<sup>2</sup> of young leaves (12 cm wide) from the same position in the upper canopy of plants ~15 cm high was separated by nondenaturing PAGE as described (1). Samples were taken from the T<sub>2</sub> *tob<sup>flo</sup>* and *tob<sup>bid</sup>* plants and the T<sub>1</sub> progeny of the *tob<sup>flo-bid</sup>* and *tob<sup>bid-flo</sup>* lines. In each sample, the L<sub>8</sub>S<sub>8</sub> rubisco was the prominent band evident by Coomassie blue staining. The rubisco content in each sample was quantified by [<sup>14</sup>C]-carboxyarabinitol-1,5-bisphosphate binding as described (2).

- Whitney SM, Sharwood RE (2008) Construction of a tobacco master line to improve Rubisco engineering in chloroplasts. *J Exp Bot* 59:1909–1921.
- Ruuska S, et al. (1998) The interplay between limiting processes in C<sub>3</sub> photosynthesis studied by rapid-response gas exchange using transgenic tobacco impaired in photosynthesis. *Aust J Plant Physiol* 25:859–870.
